# Supplementary material for: Desmopressin response depends on the presence and type of genetic variants in patients with type 1 and type 2 von Willebrand disease
Source: PubMed Central journal article supplement — Blood Adv. 2022 Sep 20;6(18):5317–26. doi: 10.1182/bloodadvances.2021006757 (PMC9631688; doi:10.1182/bloodadvances.2021006757), 2022-09-20
Supplement: advancesADV2021006757-suppl1.pdf [file advancesADV2021006757-suppl1.pdf]

## Supplemental Data

**Supplement Table 1. Overview of all variants found in our cohort and their association with desmopressin response**

|        | Proportion of patients with complete response to desmopressin |              |                           |                            |                           |
|--------|---------------------------------------------------------------|--------------|---------------------------|----------------------------|---------------------------|
|        | 0%                                                            | 0-40%        | 40-60%                    | 60-100%                    | 100%                      |
| Type 1 | I482M <sup>2</sup> (0/1)                                      |              | D141N <sup>1</sup> (1/2)  | Del exon 4-5 (5/6)         | G19R (2/2)                |
| VWD    | P812R fs*31 (0/2)                                             |              | A1716P (1/2)              | R854Q (2/3)                | R236C (1/1)               |
|        | C1149R (0/1)                                                  |              |                           | C1130C (4/6)               | C440A *fs17 (1/1)         |
|        | R1205H <sup>8</sup> (0/8)                                     |              |                           | Y1584C <sup>10</sup> (7/8) | C652F (1/1)               |
|        | R1374H (0/1)                                                  |              |                           |                            | 2442+4A>G (1/1)           |
|        | R1379C (0/1)                                                  |              |                           |                            | R924Q <sup>5</sup> (4/4)  |
|        | S2179F (0/1)                                                  |              |                           |                            | C1060Y (2/2)              |
|        |                                                               |              |                           |                            | T1156M (2/2)              |
|        |                                                               |              |                           |                            | P1162L (1/1)              |
|        |                                                               |              |                           |                            | C1190R (1/1)              |
|        |                                                               |              |                           |                            | P1266L <sup>9</sup> (1/1) |
|        |                                                               |              |                           |                            | F1369I (1/1)              |
|        |                                                               |              |                           |                            | Dup exon 28 (1/1)         |
|        |                                                               |              |                           |                            | K1794E (2/2)              |
|        |                                                               |              |                           |                            | Del exon 33-34 (3/3)      |
|        |                                                               |              |                           |                            | V1934G (1/1)              |
|        |                                                               |              |                           |                            | T1951A (3/3)              |
|        |                                                               |              |                           |                            | P2063S (1/1)              |
|        |                                                               |              |                           |                            | C2304Y (3/3)              |
|        |                                                               |              |                           |                            | C2360* (1/1)              |
|        |                                                               |              |                           |                            | A2498D (1/1)              |
|        |                                                               |              |                           |                            | N2546Y (2/2)              |
| Type 2 | C1130C (0/1)                                                  | F1293L (1/5) | C1060Y <sup>7</sup> (2/4) | R854Q <sup>4</sup> (3/4)   | W791M <sup>3</sup> (1/1)  |
| VWD    | C1149R (0/2)                                                  | R1597W (2/6) |                           | R924Q <sup>6</sup> (3/4)   | C1190Y (2/2)              |
|        | L1282P (0/1)                                                  |              |                           |                            | V1499E (2/2)              |
|        | S1285P (0/1)                                                  |              |                           |                            | G1573S (1/1)              |
|        | L1288R (0/1)                                                  |              |                           |                            |                           |
|        | L1307P (0/1)                                                  |              |                           |                            |                           |
|        | R1374C (0/3)                                                  |              |                           |                            |                           |
|        | R1374H (0/8)                                                  |              |                           |                            |                           |
|        | R1374L (0/1)                                                  |              |                           |                            |                           |
|        | K1408del (0/1)                                                |              |                           |                            |                           |
|        | N1421K (0/1)                                                  |              |                           |                            |                           |
|        | S1506L (0/2)                                                  |              |                           |                            |                           |
|        | Y1542C (0/1)                                                  |              |                           |                            |                           |
|        | I1628W (0/1)                                                  |              |                           |                            |                           |
|        | G1631D (0/1)                                                  |              |                           |                            |                           |

Of note, some variants, which are known in literature to cause both type 1 and type 2 VWD, are in this table listed as both type 1 and type 2 VWD, depending on the phenotype patients. Between ( ) indicate number of patients responded/total number of patients. <sup>1</sup>both patients also had R2313C. <sup>2</sup>also had R960W and 3108+2T>G. <sup>3</sup>Also had P812R fs\*31. <sup>4</sup>The patient who did not respond also had 6257-1G>A, whereas two patients who responded also had R2535\*. <sup>5</sup>One patient also had C1169W. <sup>6</sup>One patient who responded also had G1609R, whereas another patient who respond had R1374H. <sup>7</sup>In the two patients who did not respond, one had a homozygous form and the other one also had R854Q. One patient who responded also had V1760I. <sup>8</sup>Two patients also had 5170+10C>T. <sup>9</sup>Also had V1279I. <sup>10</sup>The patient who did not respond had a homozygous form.

Supplemental Figure 1. Desmopressin response is associated with age

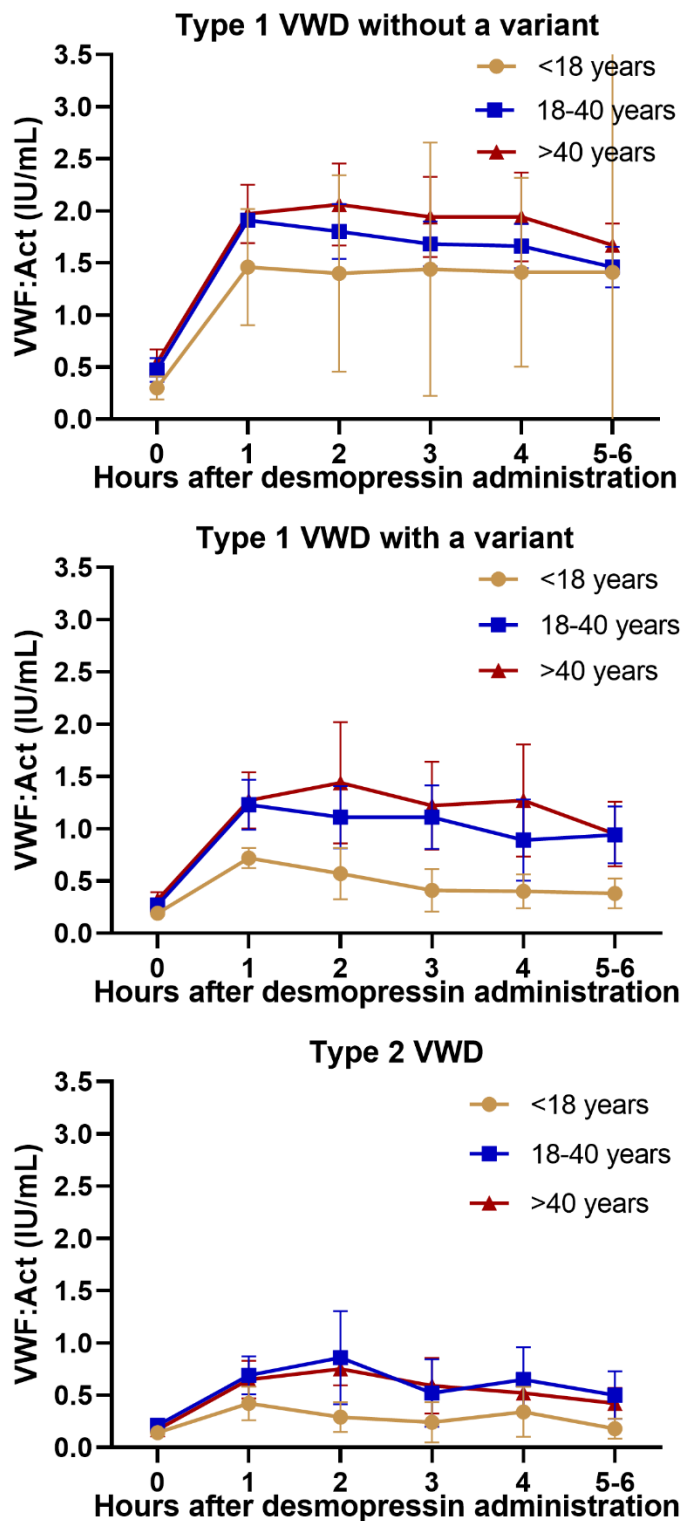

Figure legend: Data are represented as mean and 95% CI.

**Supplemental Figure 2. In type 1 VWD without a variant, patients with blood group O seem to have a less sustained desmopressin response, although not statistically significant**

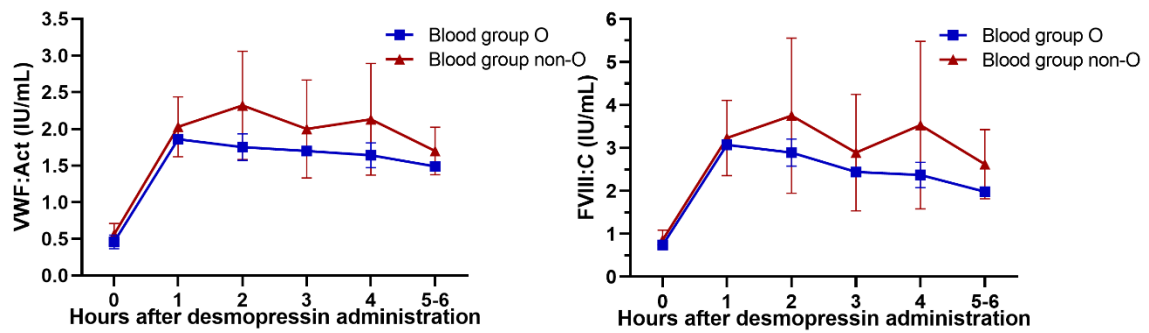

Figure legend: Data are represented as mean and 95% CI. Due to the large 95% confidence interval, none of the differences between blood group O and non-O at 1 to 5-6 hours after desmopressin were statistically significant.
